# Supplementary material
Source: HighWire-hosted journal article supplement (https://heart.bmj.com/content/107/14/1167)

## Supplemental Material

### Relative survival after aortic valve surgery in patients with bicuspid aortic valves

Natalie Glaser, MD, PhD<sup>1,2</sup>, Veronica Jackson, MD, PhD<sup>2</sup>, Per Eriksson PhD<sup>3</sup>, Ulrik Sartipy,  
MD, PhD<sup>2,4</sup>, Anders Franco-Cereceda, MD, PhD<sup>2,4</sup>

<sup>1</sup>Department of Cardiology, Stockholm South General Hospital, Stockholm, Sweden

<sup>2</sup>Department of Molecular Medicine and Surgery, Karolinska Institutet, Stockholm, Sweden

<sup>3</sup>Cardiovascular Medicine Unit, Centre for Molecular Medicine, Department of Medicine

Solna, Karolinska Institutet, Karolinska University Hospital, Stockholm, Sweden

<sup>4</sup>Department of Cardiothoracic Surgery, Karolinska University Hospital, Stockholm, Sweden

**Supplemental Figure 1.** Flow chart of the study sample.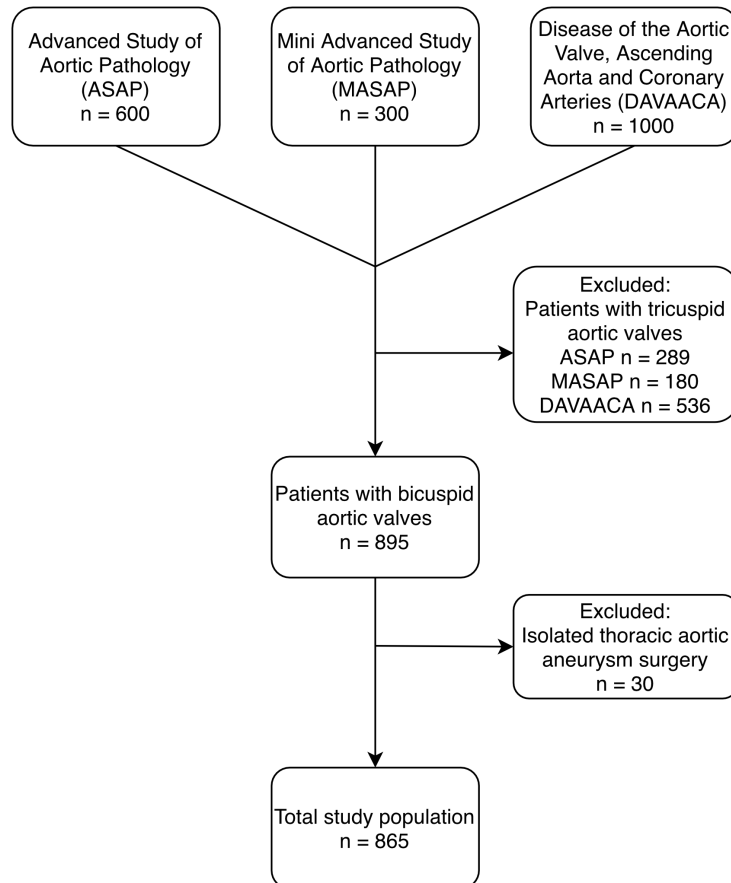

**Supplemental Figure 2.** Kaplan-Meier-estimated survival in 865 patients with bicuspid aortic valves who underwent aortic valve surgery at the Karolinska University Hospital, Stockholm, Sweden, between 2007 and 2020.

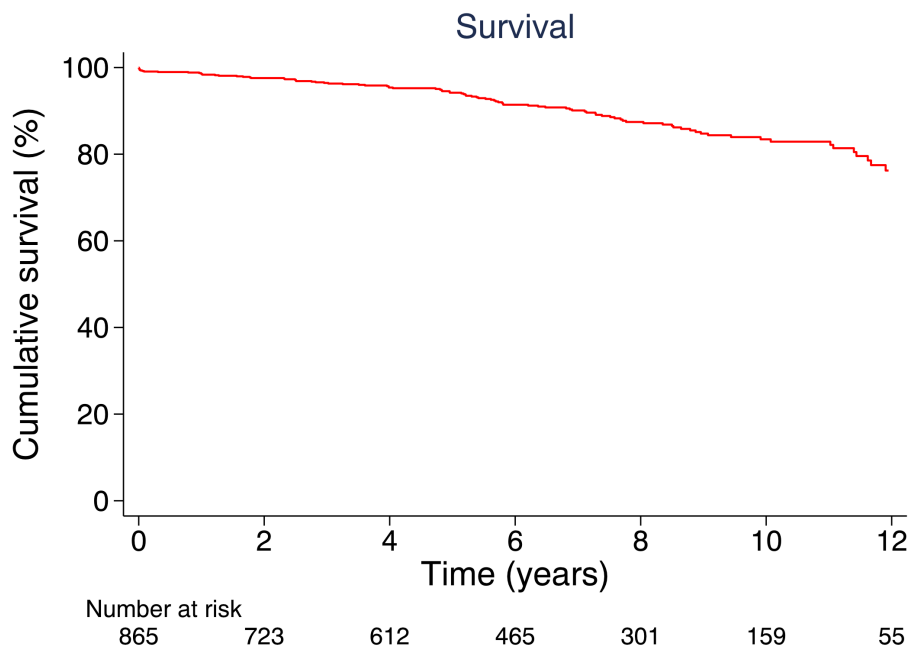

Supplement: inline-supplementary-material-1 [file inline-supplementary-material-1.pdf]
